# Supplementary material for: miR-365 Promotes Cutaneous Squamous Cell Carcinoma (CSCC) through Targeting Nuclear Factor I/B (NFIB)
Source: PubMed Central journal article supplement (PMC4065106; doi:10.1371/journal.pone.0100620), 2014-06-20
Supplement: pone.0100620.s001.pdf [file pone.0100620.s001.pdf]

Figure 1S Zhou et al

A

Position 1007–1014 of NFIB 3' UTR

5' ...CCCUCAGUUUUUGAGGGCAUUA...  
 ||||| |||||  
 3' UAUUCCUAAAAAUCCCCGUAUU

Position 5572–5578 of NFIB 3' UTR

5' ...UGCAUCCUUCaucgagggcauug...  
 |||||  
 3' UAUUCCUAAAAAUCCCCGUAUU

B

| Target gene | Representative transcript | Gene name                                                                    | Conserved sites |      |         |         | Poorly conserved sites |      |         |         | Representative miRNA | Total context+ score | Aggregate PCT | Previous TargetScan publication(s) | Links to sites in UTRs |
|-------------|---------------------------|------------------------------------------------------------------------------|-----------------|------|---------|---------|------------------------|------|---------|---------|----------------------|----------------------|---------------|------------------------------------|------------------------|
|             |                           |                                                                              | total           | 8mer | 7mer-m8 | 7mer-1A | total                  | 8mer | 7mer-m8 | 7mer-1A |                      |                      |               |                                    |                        |
| LPAR5       | NM_001142961              | lysophosphatidic acid receptor 5                                             | 1               | 1    | 0       | 0       | 2                      | 1    | 1       | 0       | hsa-miR-365          | -0.98                | < 0.1         | 2009                               | Sites in UTR           |
| SGTB        | NM_019072                 | small glutamine-rich tetratricopeptide repeat (TPR)-containing, beta         | 1               | 0    | 0       | 1       | 2                      | 2    | 0       | 0       | hsa-miR-365          | -0.67                | 0.36          |                                    | Sites in UTR           |
| TBK1        | NM_013254                 | TANK-binding kinase 1                                                        | 1               | 1    | 0       | 0       | 1                      | 0    | 0       | 1       | hsa-miR-365          | -0.65                | 0.22          |                                    | Sites in UTR           |
| MAK         | NM_001242385              | male germ cell-associated kinase                                             | 1               | 1    | 0       | 0       | 1                      | 0    | 0       | 1       | hsa-miR-365          | -0.64                | < 0.1         |                                    | Sites in UTR           |
| NR1D2       | NM_001145425              | nuclear receptor subfamily 1, group D, member 2                              | 2               | 2    | 0       | 0       | 0                      | 0    | 0       | 0       | hsa-miR-365          | -0.64                | 0.67          |                                    | Sites in UTR           |
| CPT1A       | NM_001876                 | carnitine palmitoyltransferase 1A (liver)                                    | 1               | 0    | 1       | 0       | 2                      | 0    | 1       | 1       | hsa-miR-365          | -0.60                | 0.24          | 2009                               | Sites in UTR           |
| DCUN1D5     | NM_032299                 | DCN1, defective in cullin neddylation 1, domain containing 5 (S. cerevisiae) | 1               | 0    | 1       | 0       | 3                      | 2    | 1       | 0       | hsa-miR-365          | -0.58                | 0.24          | 2007                               | Sites in UTR           |
| ACVR1       | NM_001105                 | activin A receptor, type I                                                   | 1               | 1    | 0       | 0       | 1                      | 0    | 1       | 0       | hsa-miR-365          | -0.57                | 0.64          | 2007, 2009                         | Sites in UTR           |
| DLAT        | NM_001931                 | dihydropyrimidinase S-acetyltransferase                                      | 1               | 1    | 0       | 0       | 0                      | 0    | 0       | 0       | hsa-miR-365          | -0.53                | 0.24          | 2009                               | Sites in UTR           |
| PIK3R3      | NM_001114172              | phosphoinositide-3-kinase, regulatory subunit 3 (gamma)                      | 1               | 0    | 1       | 0       | 1                      | 1    | 0       | 0       | hsa-miR-365          | -0.52                | 0.24          | 2009                               | Sites in UTR           |
| E2F2        | NM_004091                 | E2F transcription factor 2                                                   | 1               | 1    | 0       | 0       | 0                      | 0    | 0       | 0       | hsa-miR-365          | -0.52                | 0.35          | 2009                               | Sites in UTR           |
| TRHDE       | NM_013381                 | thyrotropin-releasing hormone degrading enzyme                               | 1               | 1    | 0       | 0       | 1                      | 0    | 0       | 1       | hsa-miR-365          | -0.50                | 0.59          | 2007, 2009                         | Sites in UTR           |
| RICTOR      | NM_152756                 | RPTOR independent companion of MTOR, complex 2                               | 1               | 1    | 0       | 0       | 0                      | 0    | 0       | 0       | hsa-miR-365          | -0.49                | 0.24          | 2007, 2009                         | Sites in UTR           |
| GDF11       | NM_005811                 | growth differentiation factor 11                                             | 2               | 1    | 1       | 0       | 1                      | 0    | 1       | 0       | hsa-miR-365          | -0.49                | 0.30          |                                    | Sites in UTR           |
| NFIB        | NM_001190737              | nuclear factor I/B                                                           | 3               | 1    | 1       | 1       | 0                      | 0    | 0       | 0       | hsa-miR-365          | -0.49                | 0.57          | 2007, 2009                         | Sites in UTR           |
| RIT1        | NM_006912                 | Ras-like without CAAX 1                                                      | 1               | 1    | 0       | 0       | 0                      | 0    | 0       | 0       | hsa-miR-365          | -0.48                | 0.24          | 2009                               | Sites in UTR           |
| RAPGEF4     | NM_001100397              | Rap guanine nucleotide exchange factor (GEF) 4                               | 1               | 1    | 0       | 0       | 0                      | 0    | 0       | 0       | hsa-miR-365          | -0.48                | 0.30          | 2007, 2009                         | Sites in UTR           |
| RASSF8      | NM_001164746              | Ras association (RalGDS/AF-6) domain family (N-terminal) member 8            | 1               | 1    | 0       | 0       | 0                      | 0    | 0       | 0       | hsa-miR-365          | -0.48                | 0.31          |                                    | Sites in UTR           |
| USP33       | NM_015017                 | ubiquitin specific peptidase 33                                              | 1               | 1    | 0       | 0       | 0                      | 0    | 0       | 0       | hsa-miR-365          | -0.48                | 0.56          | 2007, 2009                         | Sites in UTR           |
| USP48       | NM_032236                 | ubiquitin specific peptidase 48                                              | 1               | 1    | 0       | 0       | 0                      | 0    | 0       | 0       | hsa-miR-365          | -0.48                | 0.24          | 2007, 2009                         | Sites in UTR           |

C

Human miR-365

hsa-mir-365-1 ([MI0000767](#) HGNC:MIR365-1):

```

acc  aa      ac        ---- -  uuu
      gcaggg aaugaagg uuuuggggca  gau gug  c
      |||||  |||||||  |||||||||  ||| |||  c
      cguucu uuauuccu aaaaucuccg  cua cac  a
--a   cg      -a        aaua  u  cuu
  
```

hsa-miR-365a-5p ([MIMAT0009199](#) hsa-miR-365\*): 16 - agggacuuumggggcagaugug – 38

hsa-miR-365a-3p ([MIMAT0000710](#) hsa-miR-365): 56 - uaugcccuuaaaaauccuuau – 77

hsa-mir-365-2 ([MI0000769](#) HGNC:MIR365-2):

```

agaguguucaa g -- a      ac c      -----  u u
              g  aca  gcaagaa aaugaagg uuu aggggca  gcug guu u
              | |||  |||||||  ||||||||  ||| |||||||  ||| |||
              c  ugu  cguucuu uuauuccu aaa uccccg  ugac  cag  c
-----gggcua g  ga      g      aa -  aauac  u  u
  
```

hsa-miR-365b-5p ([MIMAT0022833](#)): 29 - agggacuucaggggcagcugu – 50

hsa-miR-365b-3p ([MIMAT0022834](#)): 68 - uaugcccuuaaaaauccuuau – 89

Figure S1 miR-365 targets prediction and sequence information.

- (A) Two of the predicted miR-365 binding sites in the 3'UTR region of NFIB.
- (B) List of miR-365 targets predicted by TargetScan.
- (C) Sequence and miRBase ID of human miR-365.

Figure 2S Zhou et al

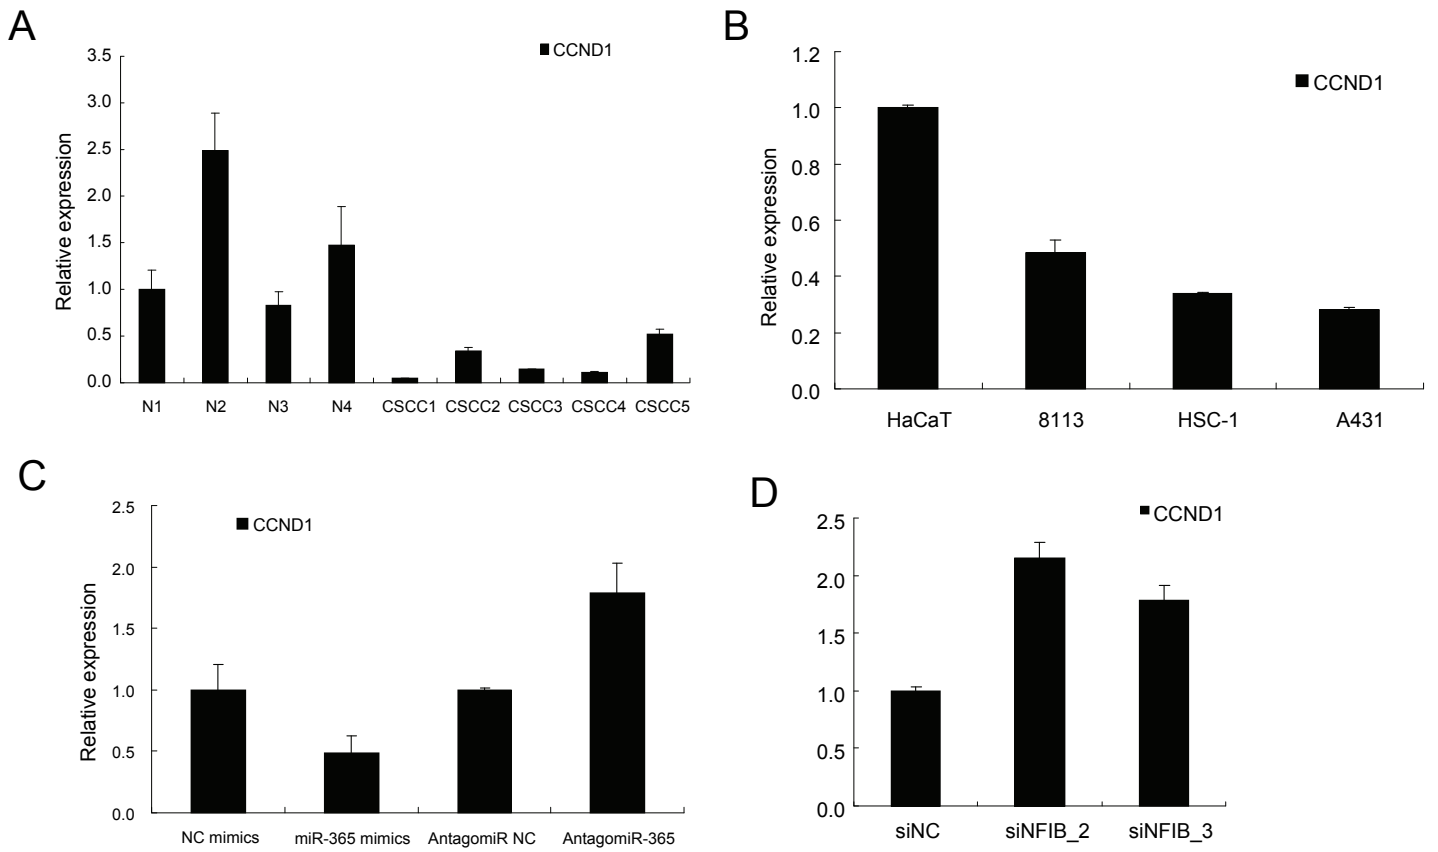

**Figure S2 CCND1 is regulated by miR-365 and NFIB**

(A) CCND1 expression in CSCC clinical tumors.

(B) CCND1 expression in CSCC cell lines.

(C) Human miR-365 targets CCND1 in CSCC cells.

(D) Knockdown of siNFIB leads to the upregulation of CCND1 in CSCC cells.
